# Supplementary material for: Metformin and Berberine Prevent Olanzapine-Induced Weight Gain in Rats
Source: PubMed Central journal article supplement (PMC3965561; doi:10.1371/journal.pone.0093310), 2014-03-25
Supplement: pone.0093310.s001.pdf [file pone.0093310.s001.pdf]

**Table S1: Genes designated on OpenArray plate**

| Function                          | Gene name                                                        | ABI inventory # |
|-----------------------------------|------------------------------------------------------------------|-----------------|
| Energy intake                     | Neuropeptide Y (NPY)                                             | Rn01410145_m1   |
|                                   | Gouti related protein (AgRP)                                     | Rn01431703_g1   |
|                                   | Proopiomelanocortin (POMC)                                       | Rn00595020_m1   |
|                                   | Melanin-concentrating hormone receptor (MCHR1)                   | Rn00755896_m1   |
|                                   | Hypothalamic orexin neuropeptide (Hcrt)                          | Rn00565995_m1   |
|                                   | Serotonin receptor 2A (HTR2A)                                    | Rn00568473_m1   |
|                                   | Serotonin receptor 2C (HTR2C)                                    | Rn00562748_m1   |
|                                   | Serotonin transporter (SERT)                                     | Rn00564737_m1   |
|                                   | Brain-derived neurotrophin factor (BDNF)                         | Rn02531967_s1   |
| Histamine H1 receptor (Hrh1)      | Rn00566691_s1                                                    |                 |
| Energy expenditure                | AMP-activated protein kinase-(AMPK)                              | Rn00576935_m1   |
|                                   | Uncoupling protein 1(UCP1)                                       | Rn00562126_m1   |
|                                   | Uncoupling protein 2(UCP2)                                       | Rn01754856_m1   |
|                                   | Uncoupling protein 3(UCP3)                                       | Rn00565874_m1   |
|                                   | PPAR $\gamma$ coactivator-1alpha (PGC-1 $\alpha$ )               | Rn00580241_m1   |
| Glucose metabolism                | Phosphoenolpyruvate carboxykinase 1 (Pck1)                       | Rn01529014_m1   |
|                                   | Phosphoenolpyruvate carboxykinase 2(Pck2)                        | Rn03648110_m1   |
|                                   | 11 beta-hydroxysteroid dehydrogenase type 1 (Hsd11b1)            | Rn00567167_m1   |
|                                   | Glucose transporters 4(GLUT4/Slc2a4)                             | Rn00562597_m1   |
|                                   | Pyruvate kinase (Pkm2)                                           | Rn00583975_m1   |
|                                   | Glycogen phosphorylase (Pygl)                                    | Rn00573974_m1   |
|                                   | Insulinotropic polypeptide (Gip)                                 | Rn00571500_m1   |
|                                   |                                                                  |                 |
| Lipid metabolism:<br>adipogenesis | Peroxisome proliferator activated receptor gamma(PPAR $\gamma$ ) | Rn00440945_m1   |
|                                   | CCAAT/enhancer binding protein alpha (C/EBP $\alpha$ )           | Rn00560963_s1   |
|                                   | GATA binding protein 2 (GATA2)                                   | Rn00583735_m1   |
|                                   | GATA binding protein 3 (GATA3)                                   | Rn00484683_m1   |
| Lipid metabolism:<br>lipogenesis  | Sterol regulatory element binding protein-1 (SREBP-1)            | Rn01495769_m1   |
|                                   | Fatty acid synthase (FAS)                                        | Rn00569117_m1   |
|                                   | Insulin-induced gene 2 (INSIG2)                                  | Rn00710111_m1   |
|                                   | Low-density lipoprotein receptor (LDLR)                          | Rn00598442_m1   |
|                                   | Citrate transporter/carrier (Slc13a5)                            | Rn00596734_m1   |
|                                   | Acetyl-co-A carboxylase alpha (Acaca)                            | Rn00573474_m1   |
|                                   | Acetyl-co-A carboxylase beta (Acacb)                             | Rn00588290_m1   |
|                                   | Glycerol-3P acyltransferase (GPAM)                               | Rn00568620_m1   |
|                                   | Stearoyl-CoA desaturase (SCD1)                                   | Rn00594894_g1   |
|                                   | HMG-CoA reductase (Hmgcr)                                        | Rn00565598_m1   |
| Lipid metabolism:<br>lipolysis    | Peroxisome proliferator activated receptor alpha(PPAR $\alpha$ ) | Rn00566193_m1   |
|                                   | Liver X receptor alpha (LXR $\alpha$ /Nr1h3)                     | Rn00581185_m1   |
|                                   | Hormone-sensitive lipase (HSL/Lipe)                              | Rn00563444_m1   |
|                                   | Apolipoprotein E (ApoE)                                          | Rn00593680_m1   |
|                                   | Acyl-CoA dehydrogenase (Acadv1)                                  | Rn00563649_m1   |
|                                   | Acyl-CoA oxidase (Acox1)                                         | Rn01460628_m1   |
|                                   | Insulin Receptor (IssR)                                          | Rn01637243_m1   |
|                                   | Phospholipase C, beta 1 (PLCB1)                                  | Rn01514511_m1   |
| Lipid metabolism:<br>adipokine    | Adiponectin (Adipoq)                                             | Rn00595250_m1   |
|                                   | Leptin (Lep)                                                     | Rn00565158_m1   |
|                                   | Resistin (Retn)                                                  | Rn00595224_m1   |
| Inflammation                      | Tumor necrosis factor $\alpha$ (TNF $\alpha$ /Tnf)               | Rn00562055_m1   |
|                                   | Interleukin 6 (IL-6)                                             | Rn01410330_m1   |
|                                   | C-Reactive Protein (CRP)                                         | Rn00567307_g1   |
| Others                            | Estrogen sulfotransferase (EST/ste2)                             | Rn01510633_m1   |
|                                   | Mitogen-activated protein kinase 14 (MAPK14)                     | Rn00578842_m1   |
|                                   | MAPK8 (c-jun N-terminal)                                         | Rn01453358_m1   |
|                                   | Mitogen-activated protein kinase 1 (MAPK1)                       | Rn00587719_m1   |
| Endogenous control                | Beta-actin (Actb)                                                | Rn00667869_m1   |
|                                   | GAPDH (Gapdh)                                                    | Rn01775763_g1   |
