# Supplementary material for: Metformin and Berberine Prevent Olanzapine-Induced Weight Gain in Rats
Source: PubMed Central journal article supplement (PMC3965561; doi:10.1371/journal.pone.0093310), 2014-03-25
Supplement: pone.0093310.s002.pdf [file pone.0093310.s002.pdf]

**Table S2: Relative quantification (RQ) of gene expression in rat brown adipose tissue**

| Function                             | Gene                                                    | RQ (Ctrl)                                    | RQ (Olan)     | RQ (Olan+Ber) | RQ (Olan+Met) |        |
|--------------------------------------|---------------------------------------------------------|----------------------------------------------|---------------|---------------|---------------|--------|
| Energy expenditure                   | Uncoupling protein 1(UCP1)                              | 1                                            | 0.8203        | 0.9344        | <b>1.2592</b> |        |
|                                      | Uncoupling protein 3(UCP3)                              | 1                                            | <b>0.6258</b> | <b>1.0927</b> | <b>0.866</b>  |        |
|                                      | AMP-activated protein kinase-(AMPK)                     | 1                                            | <b>0.2984</b> | <b>0.7719</b> | <b>1.0536</b> |        |
|                                      | PPARy coactivator-1alpha (PGC-1α)                       | 1                                            | 1.1581        | 1.1025        | 1.1912        |        |
|                                      | Uncoupling protein 2(UCP2)                              | 1                                            | <b>0.5695</b> | 0.8397        | 0.6633        |        |
| Energy intake                        | Neuropeptide Y (NPY)                                    | 1                                            | 2.395         | 2.4346        | 2.8334        |        |
| Glucose metabolism                   | Glucose transporters 4(GLUT4/Slc2a4)                    | 1                                            | <b>0.2601</b> | <b>0.5662</b> | <b>0.7345</b> |        |
|                                      | Glycogen phosphorylase (Pygl)                           | 1                                            | <b>0.3439</b> | 0.5908        | 0.5154        |        |
|                                      | Pyruvate kinase (Pkm2)                                  | 1                                            | <b>0.3443</b> | <b>0.8652</b> | 0.6787        |        |
|                                      | Phosphoenolpyruvate carboxykinase 1 (Pck1)              | 1                                            | 0.9306        | 0.8284        | 0.906         |        |
|                                      | Phosphoenolpyruvate carboxykinase 2(Pck2)               | 1                                            | <b>0.5604</b> | 0.9723        | <b>1.1389</b> |        |
| Lipid metabolism                     | Peroxisome proliferator activated receptor gamma(PPARγ) | 1                                            | <b>0.4375</b> | 0.6371        | <b>0.6995</b> |        |
|                                      | GATA binding protein 3 (GATA3)                          | 1                                            | 1.6323        | 0.9087        | 1.13          |        |
|                                      | CCAAT/enhancer binding protein alpha (C/EBPα)           | 1                                            | <b>0.4098</b> | <b>0.6171</b> | <b>0.7292</b> |        |
|                                      | Leptin (Lep)                                            | 1                                            | <b>0.3359</b> | 0.3252        | 0.4196        |        |
|                                      | Resistin (Retn)                                         | 1                                            | <b>0.2574</b> | 0.3521        | <b>0.5312</b> |        |
|                                      | Adiponectin (Adipoq)                                    | 1                                            | 0.8291        | 0.8006        | 0.9466        |        |
|                                      | HMG-CoA reductase (Hmgcr)                               | 1                                            | 0.8969        | 1.5273        | 1.2317        |        |
|                                      | Glycerol-3P acyltransferase (GPAM)                      | 1                                            | <b>0.4017</b> | <b>0.7997</b> | 0.8525        |        |
|                                      | Fatty acid synthase (FAS)                               | 1                                            | <b>0.4751</b> | <b>0.8386</b> | <b>0.8412</b> |        |
|                                      | Acetyl-co-A carboxylase alpha (Acaca)                   | 1                                            | <b>0.264</b>  | 0.6341        | 0.0962        |        |
|                                      | Acetyl-co-A carboxylase beta (Acacb)                    | 1                                            | 0.8683        | 1.1859        | 1.1465        |        |
|                                      | Stearoyl-CoA desaturase (SCD1)                          | 1                                            | 0.8177        | <b>1.6264</b> | <b>2.0457</b> |        |
|                                      | Low-density lipoprotein receptor (LDLR)                 | 1                                            | <b>0.4447</b> | 0.9503        | 0.4462        |        |
|                                      | Insulin-induced gene 2 (INSIG2)                         | 1                                            | <b>0.5394</b> | <b>1.2907</b> | <b>1.0692</b> |        |
|                                      | Sterol regulatory element binding protein-1 (SREBP-1)   | 1                                            | 0.2831        | <b>0.5465</b> | 0.4502        |        |
|                                      | Acyl-CoA dehydrogenase (Acadvl)                         | 1                                            | <b>0.5748</b> | <b>0.8586</b> | <b>1.1054</b> |        |
|                                      | Peroxisome proliferator activated receptor alpha(PPARα) | 1                                            | 0.9472        | 0.9398        | <b>1.342</b>  |        |
|                                      | Liver X receptor alpha (LXRα/Nr1h3)                     | 1                                            | <b>0.5285</b> | <b>0.867</b>  | <b>1.1585</b> |        |
|                                      | Apolipoprotein E (ApoE)                                 | 1                                            | 1.1833        | 1.5608        | 0.6811        |        |
|                                      | Acyl-CoA oxidase (Acox1)                                | 1                                            | 0.75          | 1.3394        | 1.3902        |        |
|                                      | Insulin Receptor (IssR)                                 | 1                                            | 0.4399        | 0.6096        | 0.4864        |        |
|                                      | Others                                                  | Mitogen-activated protein kinase 14 (MAPK14) | 1             | <b>0.5219</b> | <b>0.7842</b> | 0.7379 |
|                                      |                                                         | Mitogen-activated protein kinase 1 (MAPK1)   | 1             | <b>0.3312</b> | 0.6639        | 0.4108 |
| MAPK8 (c-jun N-terminal)             |                                                         | 1                                            | 0.835         | 0.9767        | <b>1.1969</b> |        |
| Estrogen sulfotransferase (EST/ste2) |                                                         | 1                                            | <b>0.2364</b> | <b>0.5898</b> | 0.2316        |        |

Bold numbers are significant at P<0.05 when compared between Olan vs. Ctrl group, or Olan+Ber vs. Olan group, or Olan+Met vs. Olan group
