# Supplementary material for: Metformin and Berberine Prevent Olanzapine-Induced Weight Gain in Rats
Source: PubMed Central journal article supplement (PMC3965561; doi:10.1371/journal.pone.0093310), 2014-03-25
Supplement: pone.0093310.s003.pdf [file pone.0093310.s003.pdf]

**Table S3: Relative quantification (RQ) of gene expression in rat skeletal muscle tissue**

| Function           | Gene                                                             | RQ (Ctrl) | RQ (Olan)     | RQ (Olan+Ber) | RQ (Olan+Met)  |
|--------------------|------------------------------------------------------------------|-----------|---------------|---------------|----------------|
| Energy expenditure | Uncoupling protein 3(UCP3)                                       | 1         | <b>5.2725</b> | 5.8264        | <b>25.2141</b> |
|                    | AMP-activated protein kinase-(AMPK)                              | 1         | 1.1366        | 1.4445        | <b>10.6677</b> |
|                    | PPAR $\gamma$ coactivator-1alpha (PGC-1 $\alpha$ )               | 1         | <b>0.6291</b> | <b>1.1504</b> | <b>7.93</b>    |
|                    | Uncoupling protein 2(UCP2)                                       | 1         | <b>0.4301</b> | 0.518         | <b>3.7121</b>  |
| Energy intake      | Melanin-concentrating hormone receptor (MCHR1)                   | 1         | 0.7247        | 1.1298        | <b>5.9765</b>  |
|                    | Neuropeptide Y (NPY)                                             | 1         | 1.683         | 2.1522        | 10.9093        |
|                    | Brain-derived neurotrophin factor (BDNF)                         | 1         | 0.6225        | 1.4633        | <b>13.6618</b> |
| Glucose metabolism | Glucose transporters 4(GLUT4/Slc2a4)                             | 1         | <b>0.6831</b> | <b>0.9159</b> | <b>5.8091</b>  |
|                    | 11 beta-hydroxysteroid dehydrogenase type 1 (Hsd11b1)            | 1         | 0.7911        | 0.9622        | <b>9.0137</b>  |
|                    | Glycogen phosphorylase (Pygl)                                    | 1         | 0.6689        | 0.9799        | 5.6517         |
|                    | Pyruvate kinase (Pkm2)                                           | 1         | 0.7276        | 0.9569        | <b>5.4085</b>  |
|                    | Phosphoenolpyruvate carboxykinase 1 (Pck1)                       | 1         | 1.737         | 1.4742        | 12.7736        |
|                    | Phosphoenolpyruvate carboxykinase 2(Pck2)                        | 1         | 1.5627        | 1.4059        | <b>7.6118</b>  |
| Lipid metabolism   | Peroxisome proliferator activated receptor gamma(PPAR $\gamma$ ) | 1         | 1.4398        | 1.4256        | <b>7.8838</b>  |
|                    | GATA binding protein 3 (GATA3)                                   | 1         | 12.4083       | 1.5022        | 7.8392         |
|                    | CCAAT/enhancer binding protein alpha (C/EBP $\alpha$ )           | 1         | 0.9374        | 1.3561        | <b>18.6854</b> |
|                    | GATA binding protein 2 (GATA2)                                   | 1         | 0.9611        | 1.149         | <b>6.1346</b>  |
|                    | Resistin (Retn)                                                  | 1         | 0.9184        | 1.7295        | 8.2144         |
|                    | Adiponectin (Adipoq)                                             | 1         | 1.5436        | 1.4222        | 8.8381         |
|                    | HMG-CoA reductase (Hmgcr)                                        | 1         | 0.7524        | 0.8707        | <b>5.3612</b>  |
|                    | Glycerol-3P acyltransferase (GPAM)                               | 1         | 1.1697        | 1.4581        | <b>8.8462</b>  |
|                    | Fatty acid synthase (FAS)                                        | 1         | 3.6696        | 1.5659        | 7.3338         |
|                    | Acetyl-co-A carboxylase alpha (Acaca)                            | 1         | 1.7466        | 2.0467        | 13.0438        |
|                    | Acetyl-co-A carboxylase beta (Acacb)                             | 1         | 0.9371        | <b>1.2831</b> | <b>8.4324</b>  |
|                    | Stearoyl-CoA desaturase (SCD1)                                   | 1         | 2.4175        | 2.9121        | 13.6912        |
|                    | Low-density lipoprotein receptor (LDLR)                          | 1         | <b>0.4547</b> | 0.5519        | <b>2.5828</b>  |
|                    | Insulin-induced gene 2 (INSIG2)                                  | 1         | 0.8104        | 1.0371        | <b>7.7335</b>  |
|                    | Sterol regulatory element binding protein-1 (SREBP-1)            | 1         | <b>4.1306</b> | 5.9079        | <b>34.5536</b> |
|                    | Acyl-CoA dehydrogenase (Acadvl)                                  | 1         | 0.9049        | 1.1229        | <b>6.6496</b>  |
|                    | Peroxisome proliferator activated receptor alpha(PPAR $\alpha$ ) | 1         | 0.7399        | 1.0053        | <b>7.2291</b>  |
|                    | Liver X receptor alpha (LXR $\alpha$ /Nr1h3)                     | 1         | 0.9602        | 1.1923        | <b>7.9329</b>  |
|                    | Apolipoprotein E (ApoE)                                          | 1         | 1.5352        | 1.2249        | <b>8.2145</b>  |
|                    | Acyl-CoA oxidase (Acox1)                                         | 1         | 0.8647        | <b>1.1199</b> | <b>6.6402</b>  |
|                    | Phospholipase C, beta 1 (PLCB1)                                  | 1         | 1.1448        | 0.9957        | no data        |
|                    | Insulin Receptor (IssR)                                          | 1         | 0.9254        | 0.989         | <b>7.9966</b>  |
| Others             | Mitogen-activated protein kinase 14 (MAPK14)                     | 1         | 0.7673        | <b>1.0373</b> | <b>6.669</b>   |
|                    | Mitogen-activated protein kinase 1 (MAPK1)                       | 1         | 0.7964        | 1.0565        | <b>4.5759</b>  |
|                    | MAPK8 (c-jun N-terminal)                                         | 1         | 0.9182        | 1.057         | <b>6.4065</b>  |
|                    | Estrogen sulfotransferase (EST/ste2)                             | 1         | 0.9817        | 1.2528        | <b>9.1726</b>  |

Bold numbers are significant at P<0.05 when compared between Olan vs. Ctrl group, or Olan+Ber vs. Olan group, or Olan+Met vs. Olan group
