# Supplementary material for: Metformin and Berberine Prevent Olanzapine-Induced Weight Gain in Rats
Source: PubMed Central journal article supplement (PMC3965561; doi:10.1371/journal.pone.0093310), 2014-03-25
Supplement: pone.0093310.s004.pdf [file pone.0093310.s004.pdf]

**Table S4: Relative quantification (RQ) of gene expression in rat liver tissue**

| Function                | Gene                                                    | RQ (Ctrl) | RQ (Olan)     | RQ (Olan+Ber) | RQ (Olan+Met) |
|-------------------------|---------------------------------------------------------|-----------|---------------|---------------|---------------|
| Energy expenditure      | AMP-activated protein kinase-(AMPK)                     | 1         | 0.9725        | 1.1593        | 1.0984        |
|                         | PPARγ coactivator-1alpha (PGC-1α)                       | 1         | <b>1.6593</b> | 2.531         | 2.7791        |
|                         | Uncoupling protein 2(UCP2)                              | 1         | 0.9871        | 0.9787        | 1.0092        |
| Energy intake           | Neuropeptide Y (NPY)                                    | 1         | 0.4508        | 0.4051        | 0.497         |
| Glucose metabolism      | 11 beta-hydroxysteroid dehydrogenase type 1 (Hsd11b1)   | 1         | 1.0782        | 1.4803        | 0.5996        |
|                         | Glycogen phosphorylase (Pygl)                           | 1         | 0.9947        | 1.2045        | 1.0406        |
|                         | Phosphoenolpyruvate carboxykinase 1 (Pck1)              | 1         | <b>4.5756</b> | <b>2.4559</b> | 3.6892        |
|                         | Phosphoenolpyruvate carboxykinase 2(Pck2)               | 1         | <b>1.5112</b> | 1.4758        | 1.5623        |
| Inflammation            | C-Reactive Protein (CRP)                                | 1         | <b>1.2941</b> | 1.4143        | 1.2061        |
| Lipid metabolism        | Peroxisome proliferator activated receptor gamma(PPARγ) | 1         | 0.7454        | 0.7925        | 0.9284        |
|                         | GATA binding protein 3 (GATA3)                          | 1         | 1.1369        | 1.1734        | 1.2346        |
|                         | CCAAT/enhancer binding protein alpha (C/EBPα)           | 1         | <b>0.6867</b> | <b>1.0102</b> | <b>1.0423</b> |
|                         | GATA binding protein 2 (GATA2)                          | 1         | 1.3388        | 1.309         | 1.1717        |
|                         | HMG-CoA reductase (Hmgcr)                               | 1         | <b>0.4599</b> | 0.8487        | <b>0.9876</b> |
|                         | Glycerol-3P acyltransferase (GPAM)                      | 1         | 0.999         | 0.9361        | 0.7248        |
|                         | Fatty acid synthase (FAS)                               | 1         | <b>0.4548</b> | 0.6634        | 0.7528        |
|                         | Acetyl-co-A carboxylase alpha (Acaca)                   | 1         | 0.9848        | 1.4051        | 1.7197        |
|                         | Acetyl-co-A carboxylase beta (Acacb)                    | 1         | 0.9064        | 1.1723        | 0.9437        |
|                         | Stearoyl-CoA desaturase (SCD1)                          | 1         | 0.3991        | 0.6632        | 0.8532        |
|                         | Citrate transporter/carrier (Slc13a5)                   | 1         | 1.3694        | 1.4929        | 1.1423        |
|                         | Low-density lipoprotein receptor (LDLR)                 | 1         | 0.8952        | 1.0698        | 1.1579        |
|                         | Insulin-induced gene 2 (INSIG2)                         | 1         | <b>1.9591</b> | 1.5637        | <b>0.9216</b> |
|                         | Sterol regulatory element binding protein-1 (SREBP-1)   | 1         | 0.8302        | <b>1.4149</b> | 1.3042        |
|                         | Acyl-CoA dehydrogenase (Acadvl)                         | 1         | <b>1.2746</b> | 1.357         | 1.3059        |
|                         | Peroxisome proliferator activated receptor alpha(PPARα) | 1         | 1.3311        | 1.4724        | 1.2987        |
|                         | Liver X receptor alpha (LXRα/Nr1h3)                     | 1         | 1.1069        | 1.1864        | 1.1911        |
|                         | Apolipoprotein E (ApoE)                                 | 1         | 1.1971        | 1.3812        | 1.2497        |
|                         | Acyl-CoA oxidase (Acox1)                                | 1         | <b>1.4725</b> | 1.5201        | 1.3848        |
|                         | Phospholipase C, beta 1 (PLCB1)                         | 1         | 1.1252        | 1.251         | <b>0.1716</b> |
| Insulin Receptor (IssR) | 1                                                       | 0.8849    | 1.0633        | 1.017         |               |
| Others                  | Mitogen-activated protein kinase 14 (MAPK14)            | 1         | 0.8256        | <b>1.1154</b> | 1.0912        |
|                         | Mitogen-activated protein kinase 1 (MAPK1)              | 1         | 1.1105        | 1.1865        | 1.1235        |
|                         | MAPK8 (c-jun N-terminal)                                | 1         | <b>1.4227</b> | 1.7085        | 1.3491        |
|                         | Estrogen sulfotransferase (EST/ste2)                    | 1         | 0.9062        | 1.0904        | 1.0763        |

Bold numbers are significant at P<0.05 when compared between Olan vs. Ctrl group, or Olan+Ber vs. Olan group, or Olan+Met vs. Olan group
