# Supplementary material for: Metformin and Berberine Prevent Olanzapine-Induced Weight Gain in Rats
Source: PubMed Central journal article supplement (PMC3965561; doi:10.1371/journal.pone.0093310), 2014-03-25
Supplement: pone.0093310.s005.pdf [file pone.0093310.s005.pdf]

**Table S5: Relative quantification (RQ) of gene expression in rat white adipose tissue**

| Function                        | Gene                                                    | RQ (Ctrl)     | RQ (Olan)     | RQ (Olan+Ber) | RQ (Olan+Met) |
|---------------------------------|---------------------------------------------------------|---------------|---------------|---------------|---------------|
| Energy expenditure              | Uncoupling protein 1(UCP1)                              | 1             | 1.1257        | 0.9187        | <b>0.5976</b> |
|                                 | Uncoupling protein 3(UCP3)                              | 1             | 0.9076        | 0.8517        | 0.774         |
|                                 | AMP-activated protein kinase-(AMPK)                     | 1             | 0.7135        | 0.7842        | 0.9662        |
|                                 | PPARy coactivator-1alpha (PPGC-1a)                      | 1             | 1.0719        | 0.9314        | 1.1531        |
|                                 | Uncoupling protein 2(UCP2)                              | 1             | <b>0.4168</b> | 0.4534        | 0.5022        |
| Energy intake                   | Serotonin transporter (SERT)                            | 1             | 0.4689        | 0.4384        | 1.0554        |
|                                 | Neuropeptide Y (NPY)                                    | 1             | 0.9503        | 0.7849        | <b>1.9328</b> |
| Glucose metabolism              | Glucose transporters 4(GLUT4/Slc2a4)                    | 1             | <b>0.6919</b> | <b>1.7306</b> | <b>1.1937</b> |
|                                 | 11 beta-hydroxysteroid dehydrogenase type 1 (Hsd11b1)   | 1             | 1.3417        | 1.6528        | 1.6998        |
|                                 | Glycogen phosphorylase (Pygl)                           | 1             | 1.0645        | <b>1.6001</b> | <b>1.6395</b> |
|                                 | Pyruvate kinase (Pkm2)                                  | 1             | 0.8344        | <b>1.157</b>  | 0.7264        |
|                                 | Phosphoenolpyruvate carboxykinase 1 (Pck1)              | 1             | <b>1.9056</b> | 1.7782        | 2.0638        |
|                                 | Phosphoenolpyruvate carboxykinase 2(Pck2)               | 1             | 0.7283        | 1.001         | <b>1.7455</b> |
| Lipid metabolism                | Peroxisome proliferator activated receptor gamma(PPARγ) | 1             | 1.2541        | <b>1.9716</b> | <b>2.0387</b> |
|                                 | GATA binding protein 3 (GATA3)                          | 1             | 1.3531        | <b>0.5908</b> | <b>0.3241</b> |
|                                 | CCAAT/enhancer binding protein alpha (C/EBPα)           | 1             | <b>1.5371</b> | <b>2.3521</b> | <b>2.7735</b> |
|                                 | GATA binding protein 2 (GATA2)                          | 1             | 0.9927        | 0.6027        | <b>1.2382</b> |
|                                 | Leptin (Lep)                                            | 1             | 1.4334        | <b>3.1486</b> | <b>3.1338</b> |
|                                 | Resistin (Retn)                                         | 1             | 1.0035        | <b>1.6825</b> | 1.4622        |
|                                 | Adiponectin (Adipoq)                                    | 1             | <b>1.9209</b> | 2.1533        | 2.6437        |
|                                 | HMG-CoA reductase (Hmgcr)                               | 1             | <b>0.5825</b> | <b>0.7815</b> | 0.7125        |
|                                 | Glycerol-3P acyltransferase (GPAM)                      | 1             | <b>1.2941</b> | <b>2.9321</b> | <b>2.3294</b> |
|                                 | Fatty acid synthase (FAS)                               | 1             | <b>1.5579</b> | <b>2.8311</b> | <b>2.0223</b> |
|                                 | Acetyl-co-A carboxylase alpha (Acaca)                   | 1             | 0.7424        | 1.7355        | <b>1.3982</b> |
|                                 | Acetyl-co-A carboxylase beta (Acacb)                    | 1             | <b>1.327</b>  | 1.7079        | 1.1045        |
|                                 | Stearoyl-CoA desaturase (SCD1)                          | 1             | <b>3.569</b>  | <b>4.8277</b> | 3.268         |
|                                 | Low-density lipoprotein receptor (LDLR)                 | 1             | <b>0.48</b>   | 0.5398        | 0.4104        |
|                                 | Insulin-induced gene 2 (INSIG2)                         | 1             | 0.4742        | 1.1118        | <b>1.224</b>  |
|                                 | Sterol regulatory element binding protein-1 (SREBP-1)   | 1             | <b>0.5412</b> | <b>1.1571</b> | <b>1.2275</b> |
|                                 | Acyl-CoA dehydrogenase (Acadvl)                         | 1             | 0.8832        | <b>1.0685</b> | 0.9995        |
|                                 | Peroxisome proliferator activated receptor alpha(PPARα) | 1             | 1.0601        | 0.8645        | 0.9966        |
|                                 | Liver X receptor alpha (LXRα/Nr1h3)                     | 1             | 1.5782        | 1.8477        | 2.0035        |
|                                 | Apolipoprotein E (ApoE)                                 | 1             | <b>0.4891</b> | <b>0.4128</b> | <b>0.6056</b> |
| Acyl-CoA oxidase (Acox1)        | 1                                                       | 1.0737        | <b>1.3532</b> | 1.3132        |               |
| Phospholipase C, beta 1 (PLCB1) | 1                                                       | <b>0.3736</b> | 0.1912        |               |               |
| Insulin Receptor (IssR)         | 1                                                       | 0.7932        | <b>1.2356</b> | 1.4171        |               |
| Others                          | Mitogen-activated protein kinase 14 (MAPK14)            | 1             | <b>0.5432</b> | 0.6093        | 0.7106        |
|                                 | Mitogen-activated protein kinase 1 (MAPK1)              | 1             | <b>0.6574</b> | 0.6445        | 0.7301        |
|                                 | MAPK8 (c-jun N-terminal)                                | 1             | 0.9281        | 0.9632        | 0.961         |
|                                 | Estrogen sulfotransferase (EST/ste2)                    | 1             | 0.9996        | 1.5356        | <b>1.6695</b> |

Bold numbers are significant at P<0.05 when compared between Olan vs. Ctrl group, or Olan+Ber vs. Olan group, or Olan+Met vs. Olan group
